# Supplementary material for: Investigation of quinoline-4-carboxylic acid as a highly potent scaffold for the development of alkaline phosphatase inhibitors: synthesis, SAR analysis and molecular modelling studies
Source: Royal Society of Chemistry journal article supplement (doi:10.1039/c5ra12455g), 2015-01-01
Supplement: c5ra12455g1.pdf [file c5ra12455g1.pdf]

**Investigation of quinoline-4-carboxylic acid as a highly potent scaffold for the development of alkaline phosphatase inhibitors: Synthesis, SAR analysis and molecular modelling studies**

Imtiaz Khan<sup>a†‡</sup>, Syed Jawad Ali Shah<sup>b‡</sup>, Syeda Abida Ejaz<sup>b‡</sup>, Aliya Ibrar<sup>a‡</sup>, Shahid Hameed<sup>a,\*</sup>,  
Joanna Lecka<sup>c,d</sup>, Jose Luis Millan<sup>e</sup>, Jean Sévigny<sup>c,d</sup> and Jamshed Iqbal<sup>b,\*</sup>

<sup>a</sup>*Department of Chemistry, Quaid-i-Azam University, Islamabad-45320, Pakistan*

<sup>b</sup>*Centre for Advanced Drug Research, COMSATS Institute of Information Technology, Abbottabad-22060, Pakistan*

<sup>c</sup>*Département de microbiologie-infectiologie et d'immunologie, Faculté de Médecine, Université Laval, Québec, QC, Canada*

<sup>d</sup>*Centre de Recherche du CHU de Québec – Université Laval, Québec, QC, Canada*

<sup>e</sup>*Sanford Children's Health Research Center, Sanford-Burnham Medical Research Institute, La Jolla, CA 92037*

<sup>†</sup>*Present Address: School of Chemistry, University of Nottingham, University Park, Nottingham, NG7 2RD (UK)*

<sup>‡</sup>*These authors contributed equally.*

**Supporting Information**

<sup>1</sup>H and <sup>13</sup>C NMR spectra of synthesized compounds

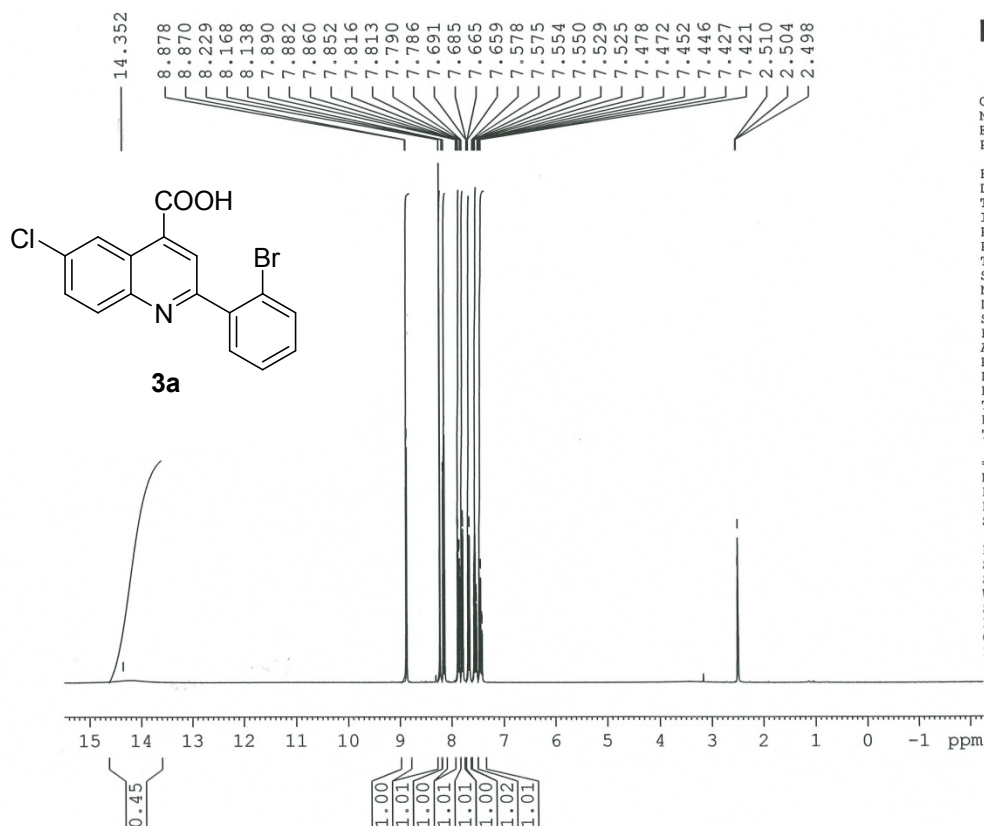

**BRÜKER**

Current Data Parameters  
NAME RXN-29\_1HNMR DMSO  
EXPNO 1  
PROCNO 1

F2 - Acquisition Parameters  
Date\_ 20111018  
Time 10.43  
INSTRUM spect  
PROBHD 5 mm BBO BB-1H  
PULPROG zg30  
TD 65536  
SOLVENT DMSO  
NS 4  
DS 0  
SWH 6172.839 Hz  
FIDRES 0.094190 Hz  
AQ 5.3084660 sec  
RG 161.3  
DW 81.000 usec  
DE 6.00 usec  
TE 292.8 K  
D1 1.00000000 sec  
TD0 1

===== CHANNEL f1 =====  
NUC1 1H  
P1 9.00 usec  
PL1 2.00 dB  
SFO1 300.1318534 MHz

F2 - Processing parameters  
SI 32768  
SF 300.1300000 MHz  
WDW EM  
SSB 0  
LB 0.30 Hz  
GB 0  
PC 1.00

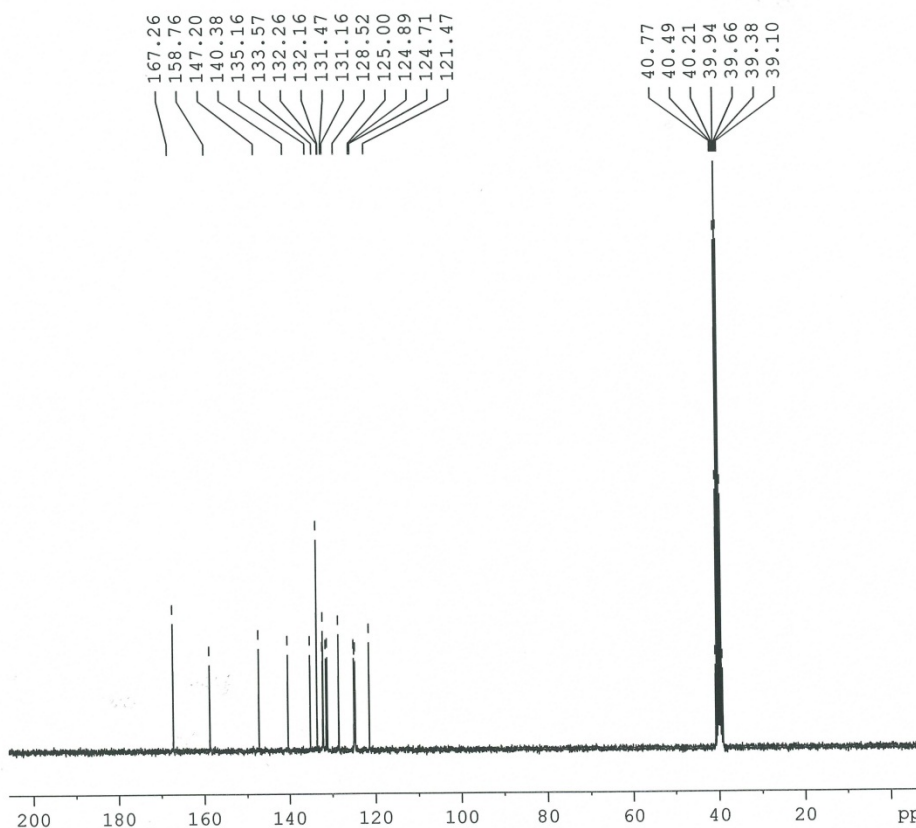

**BRÜKER**

Current Data Parameters  
NAME RXN-29\_13CNMR DMSO  
EXPNO 1  
PROCNO 1

F2 - Acquisition Parameters  
Date\_ 20111018  
Time 10.13  
INSTRUM spect  
PROBHD 5 mm BBO BB-1H  
PULPROG zgpg30  
TD 35968  
SOLVENT DMSO  
NS 437  
DS 0  
SWH 17985.611 Hz  
FIDRES 0.500045 Hz  
AQ 0.9999604 sec  
RG 1448.2  
DW 27.800 usec  
DE 6.00 usec  
TE 292.9 K  
D1 2.00000000 sec  
d11 0.03000000 sec  
DELTA 1.89999998 sec  
TD0 1

===== CHANNEL f1 =====  
NUC1 13C  
P1 6.00 usec  
PL1 -5.00 dB  
SFO1 75.4752953 MHz

===== CHANNEL f2 =====  
CPDPRG2 waltz16  
NUC2 1H  
PCPD2 80.00 usec  
PL2 2.00 dB  
PL12 20.98 dB  
PL13 20.00 dB  
SFO2 300.1312005 MHz

F2 - Processing parameters  
SI 32768  
SF 75.4677490 MHz  
WDW EM  
SSB 0  
LB 1.00 Hz  
GB 0  
PC 1.40

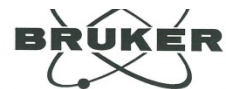

```
Current Data Parameters
NAME      RXN-30_1HNMR_DMSO
EXPNO      1
PROCNO     1
```

```

F2 - Acquisition Parameters
Date_      20111013
Time_      15.26
INSTRUM    spect
PROBHD     5 mm BBO BB-H1
PULPROG    zg30
TD          65536
SOLVENT    DMSO
NS          4
DS          0
SWH         6172.839 Hz
FIDRES     0.094190 Hz
AQ         5.3084660 sec
RG          256
RQ         81.000000
DE         6.00
TE         293.9 K
D1         1.00000000 sec
TD0        1

```

```
===== CHANNEL f1 =====
NUC1                1H
P1                  9.00 usec
PL1                 2.00 dB
SFO1               300.1318534 MHz
```

```
F2 - Processing parameters
SI                32768
SF                300.130000 MHz
WDW               EM
SSB               0
LB                0.30 Hz
GB               0
PC               1.00
```

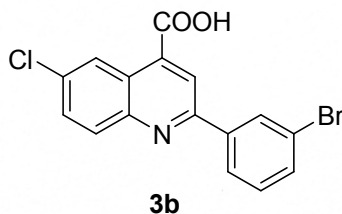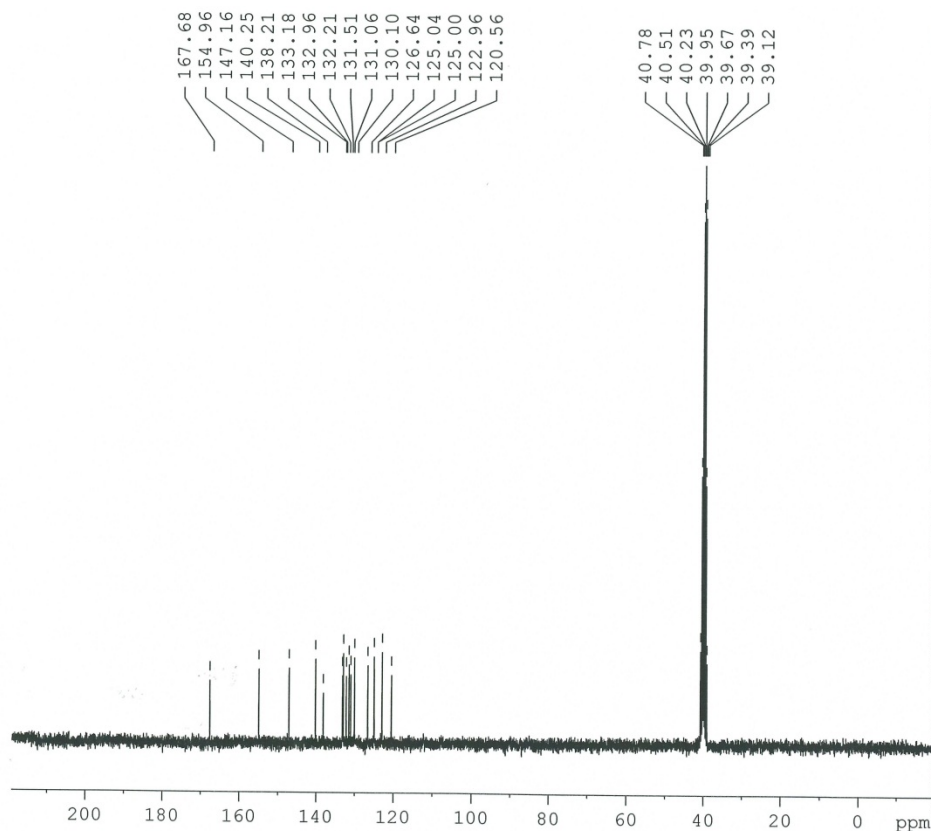

```
Current Data Parameters
NAME      RXN-30_13CNMR_DMSO
EXPNO     1
PROCNO    1
```

```

F2 - Acquisition Parameters
Date_      20111013
Time_      15.24
INSTRUM    spect
PROBHD     5 mm BBO BH-1H
PULPROG    zgpg30
TD          35968
SOLVENT    DMSO
NS          118
DS          0
SWH         17985.611 Hz
FIDRES     0.500045 Hz
AQ          0.99999604 sec
RG          1625.5
DE          27.800 umsec
TE          6.00 K
TW          294.3 K
D1          2.00000000 sec
d11         0.03000000 sec
DELTA      1.89999998 sec
TD0         1

```

```
===== CHANNEL f1 =====  
NUC1                13C  
P1                  6.00 usec  
PL1                 -5.00 dB  
SFO1               75.4752953 MHz
```

```

===== CHANNEL f2 =====
CPDPRG2          waltz16
NUC2              1H
PCPD2            80.00 usec
PL2              2.00 dB
PL12             20.98 dB
PL13             20.00 dB
SFO2            300.1312005 MHz

```

```

F2 - Processing parameters
SI                      32768
SF                      75.4677490 MHz
WDW                      EM
SSB                      0
LB                      1.00 Hz
GB                      0
PC                      1.40

```

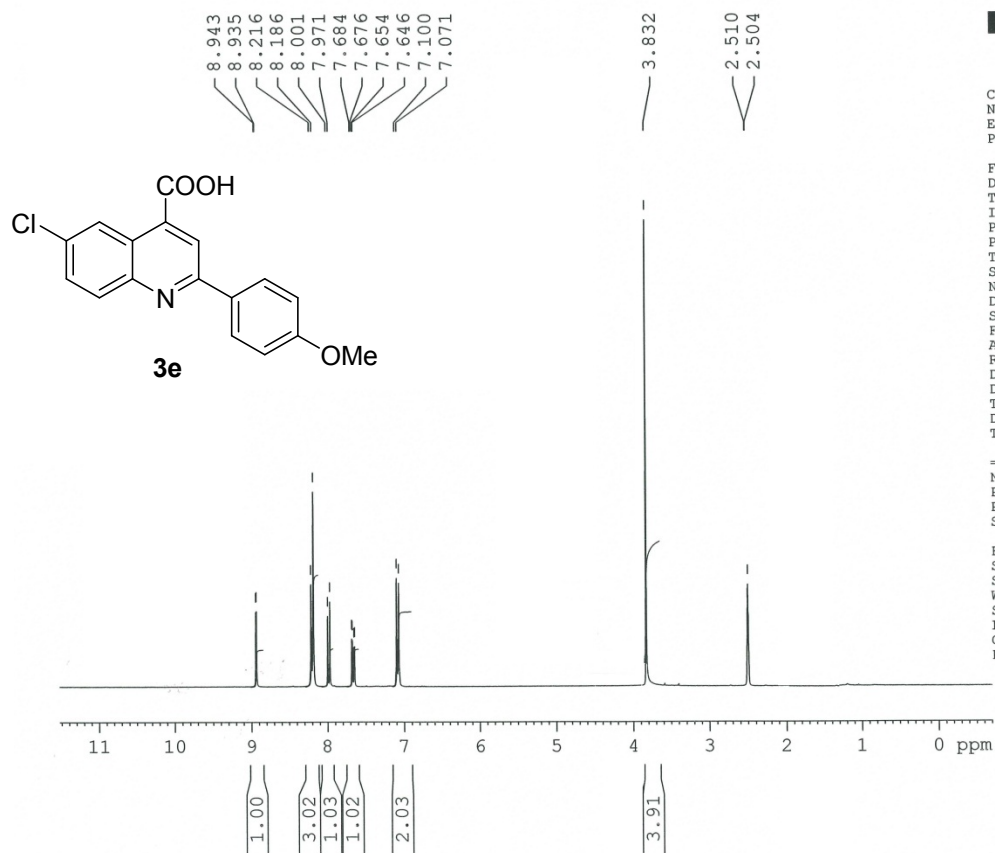

**BRÜKER**

Current Data Parameters  
NAME RXN-32\_1HNMR DMSO  
EXPNO 1  
PROCNO 1

F2 - Acquisition Parameters  
Date\_ 20110926  
Time\_ 14.58  
INSTRUM spect  
PROBHD 5 mm BBO BB-1H  
PULPROG zg30  
TD 65536  
SOLVENT DMSO  
NS 4  
DS 0  
SWH 6172.839 Hz  
FIDRES 0.094190 Hz  
AQ 5.3084660 sec  
RG 143.7  
DW 81.000 usec  
DE 6.00 usec  
TE 294.3 K  
D1 1.00000000 sec  
TD0 1

===== CHANNEL f1 =====  
NUC1 1H  
P1 9.00 usec  
PL1 2.00 dB  
SFO1 300.1318534 MHz

F2 - Processing parameters  
SI 32768  
SF 300.1300000 MHz  
WDW EM  
SSB 0  
LB 0.30 Hz  
GB 0  
PC 1.00

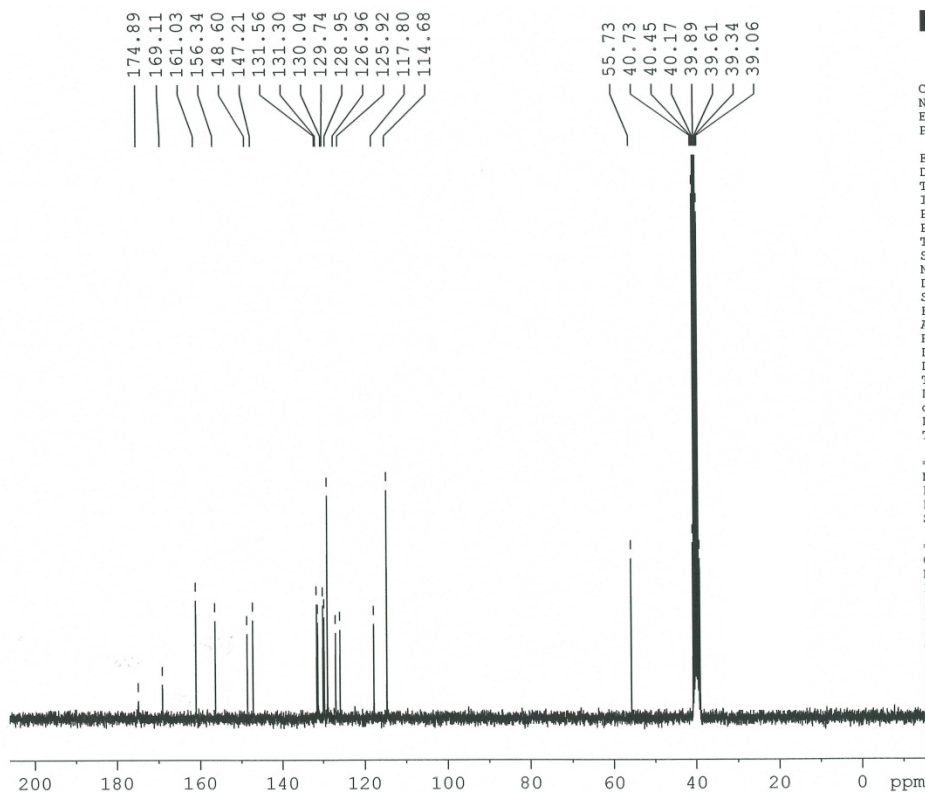

**BRÜKER**

Current Data Parameters  
NAME RXN-32\_13CNMR DMSO  
EXPNO 1  
PROCNO 1

F2 - Acquisition Parameters  
Date\_ 20110926  
Time\_ 14.56  
INSTRUM spect  
PROBHD 5 mm BBO BB-1H  
PULPROG zgpg30  
TD 35968  
SOLVENT DMSO  
NS 455  
DS 0  
SWH 17985.611 Hz  
FIDRES 0.500045 Hz  
AQ 0.9999604 sec  
RG 2580.3  
DW 27.800 usec  
DE 6.00 usec  
TE 294.7 K  
D1 2.00000000 sec  
d11 0.03000000 sec  
DELTA 1.89999998 sec  
TD0 1

===== CHANNEL f1 =====  
NUC1 13C  
P1 6.00 usec  
PL1 -5.00 dB  
SFO1 75.4752953 MHz

===== CHANNEL f2 =====  
CPDPRG2 waltz16  
NUC2 1H  
PCPD2 80.00 usec  
PL2 2.00 dB  
PL12 20.98 dB  
PL13 20.00 dB  
SFO2 300.1312005 MHz

F2 - Processing parameters  
SI 32768  
SF 75.4677490 MHz  
WDW EM  
SSB 0  
LB 1.00 Hz  
GB 0  
PC 1.40



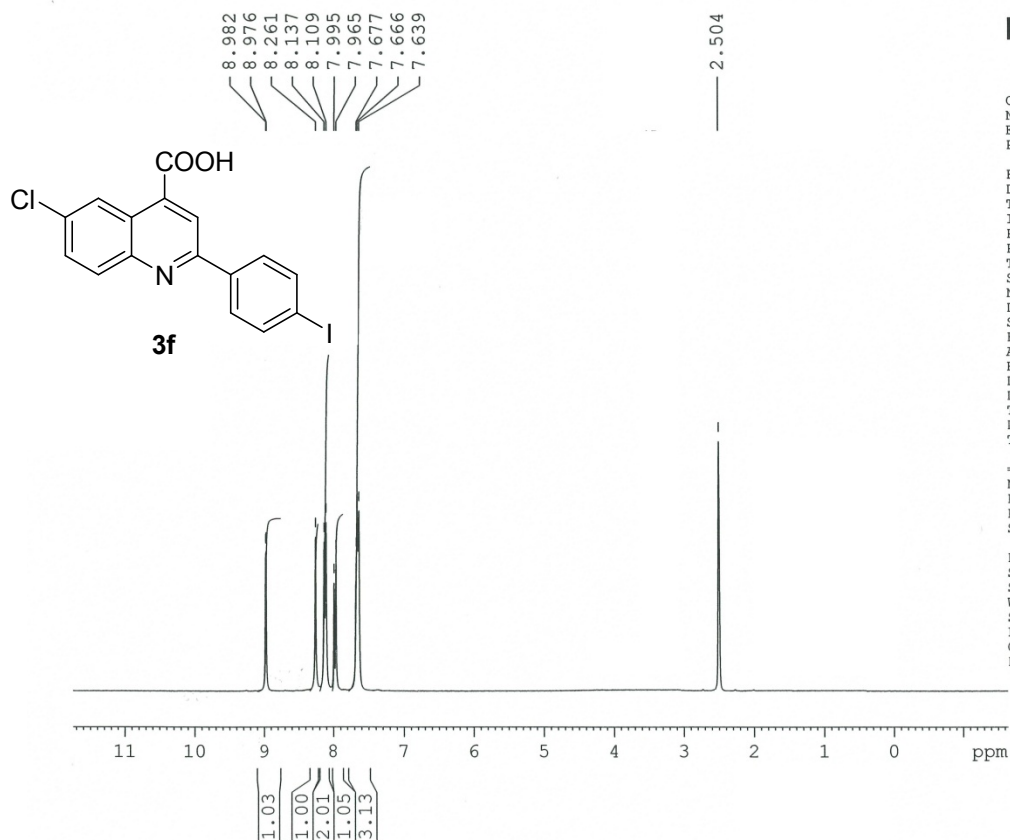

**BRUKER**

Current Data Parameters  
NAME RXN-31\_1HNMR\_DMSO  
EXPNO 1  
PROCNO 1

F2 - Acquisition Parameters  
Date\_ 20110920  
Time\_ 11.56  
INSTRUM spect  
PROBHD 5 mm BBO BB-1H  
PULPROG zg30  
TD 65536  
SOLVENT DMSO  
NS 8  
DS 0  
SWH 6172.839 Hz  
FIDRES 0.094190 Hz  
AQ 5.3084660 sec  
RG 181  
DW 81.000 usec  
DE 6.00 usec  
TE 293.2 K  
D1 1.00000000 sec  
TD0 1

===== CHANNEL f1 =====  
NUC1 1H  
P1 9.00 usec  
PL1 2.00 dB  
SFO1 300.1318534 MHz

F2 - Processing parameters  
SI 32768  
SF 300.1300000 MHz  
WDW EM  
SSB 0  
LB 0.30 Hz  
GB 0  
PC 1.00

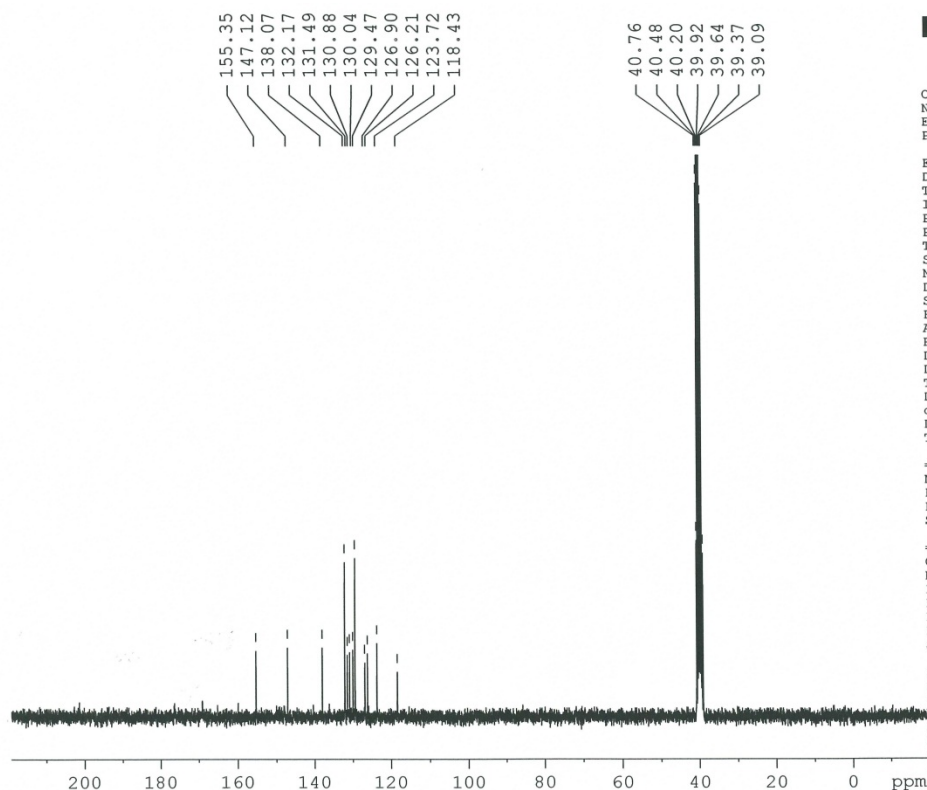

**BRUKER**

Current Data Parameters  
NAME RXN-31\_13CNMR\_DMSO  
EXPNO 1  
PROCNO 1

F2 - Acquisition Parameters  
Date\_ 20110920  
Time\_ 11.50  
INSTRUM spect  
PROBHD 5 mm BBO BB-1H  
PULPROG zgpg30  
TD 35968  
SOLVENT DMSO  
NS 409  
DS 0  
SWH 17985.611 Hz  
FIDRES 0.500045 Hz  
AQ 0.9999604 sec  
RG 3649.1  
DW 27.800 usec  
DE 6.00 usec  
TE 293.7 K  
D1 2.00000000 sec  
d11 0.03000000 sec  
DELTA 1.89999998 sec  
TD0 1

===== CHANNEL f1 =====  
NUC1 13C  
P1 6.00 usec  
PL1 -5.00 dB  
SFO1 75.4752953 MHz

===== CHANNEL f2 =====  
CPDPRG2 waltz16  
NUC2 1H  
PCPD2 80.00 usec  
PL2 2.00 dB  
PL12 20.98 dB  
PL13 20.00 dB  
SFO2 300.1312005 MHz

F2 - Processing parameters  
SI 32768  
SF 75.4677490 MHz  
WDW EM  
SSB 0  
LB 1.00 Hz  
GB 0  
PC 1.40

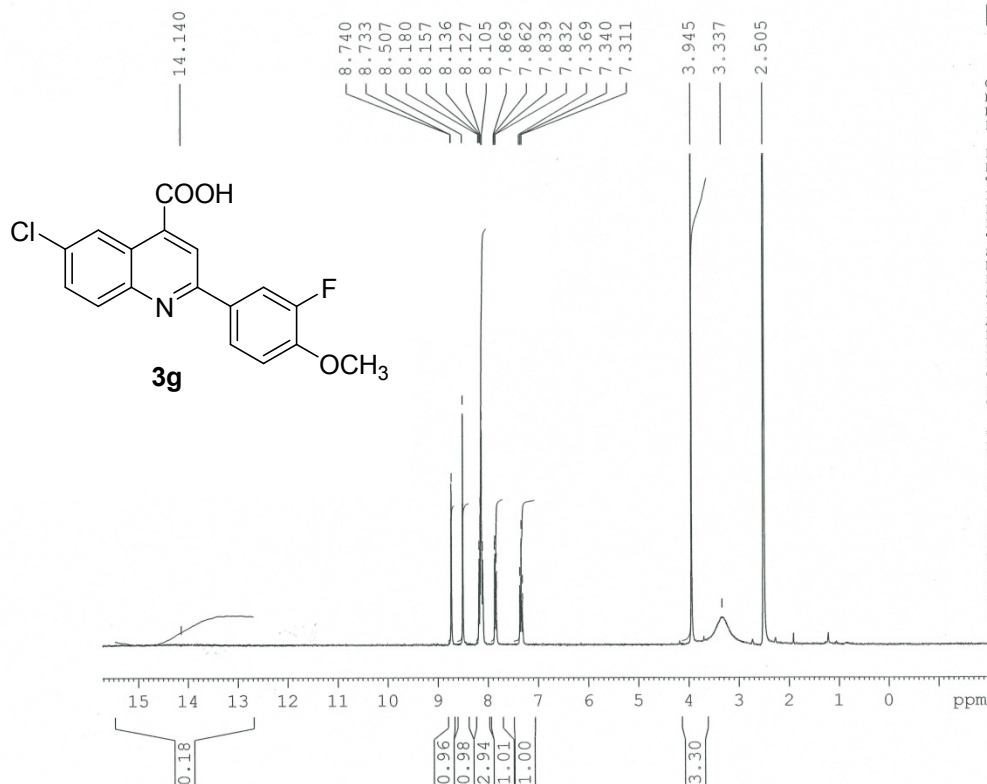

**BRUKER**

Current Data Parameters  
NAME QA-1\_1HNMR\_DMSO  
EXPNO 1  
PROCNO 1

F2 - Acquisition Parameters  
Date 20110603  
Time 17.56  
INSTRUM spect  
PROBHD 5 mm BBO BB-1H  
PULPROG zg30  
TD 65536  
SOLVENT DMSO  
NS 16  
DS 0  
SWH 6172.839 Hz  
FIDRES 0.094190 Hz  
AQ 5.3084660 sec  
RG 812.7  
DW 81.000 usec  
DE 6.00 usec  
TE 298.7 K  
D1 1.00000000 sec  
TD0 1

===== CHANNEL f1 =====  
NUC1 1H  
P1 9.00 usec  
PL1 2.00 dB  
SFO1 300.1318534 MHz

F2 - Processing parameters  
SI 32768  
SF 300.1300000 MHz  
WDW EM  
SSB 0  
LB 0.30 Hz  
GB 0  
PC 1.00

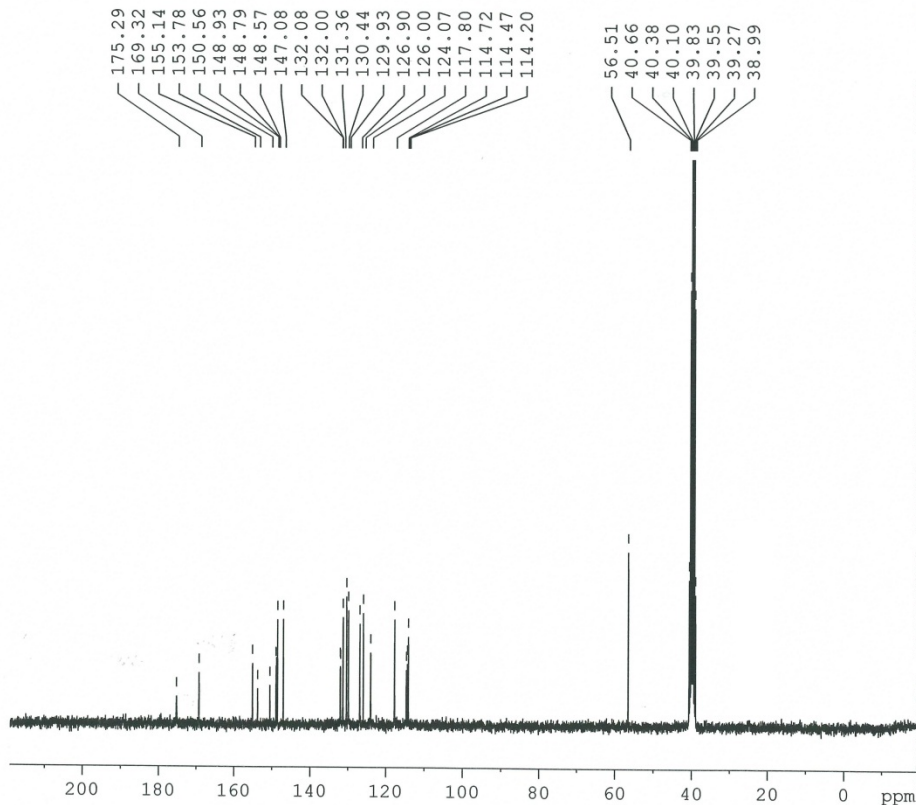

**BRUKER**

Current Data Parameters  
NAME RXN-33\_13CNMR\_DMSO  
EXPNO 1  
PROCNO 1

F2 - Acquisition Parameters  
Date 20110005  
Time 9.25  
INSTRUM spect  
PROBHD 5 mm BBO BB-1H  
PULPROG zgpg30  
TD 35968  
SOLVENT DMSO  
NS 550  
DS 0  
SWH 17985.611 Hz  
FIDRES 0.500045 Hz  
AQ 0.9999604 sec  
RG 1824.6  
DW 27.800 usec  
DE 6.00 usec  
TE 293.8 K  
D1 2.00000000 sec  
d11 0.03000000 sec  
DELTA 1.89999998 sec  
TD0 1

===== CHANNEL f1 =====  
NUC1 13C  
P1 6.00 usec  
PL1 -5.00 dB  
SFO1 75.4752953 MHz

===== CHANNEL f2 =====  
CPDPRG2 waltz16  
NUC2 1H  
PCPD2 80.00 usec  
PL2 2.00 dB  
PL12 20.98 dB  
PL13 20.00 dB  
SFO2 300.1312005 MHz

F2 - Processing parameters  
SI 32768  
SF 75.4677490 MHz  
WDW EM  
SSB 0  
LB 1.00 Hz  
GB 0  
PC 1.40

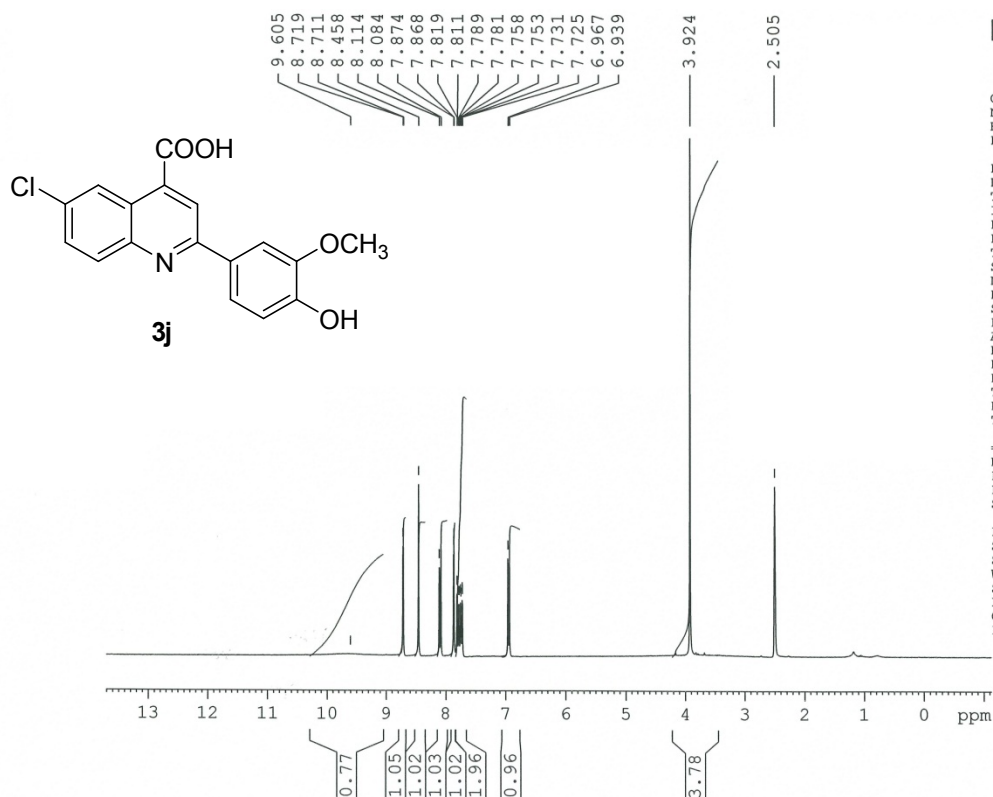

**BRÜKER**

Current Data Parameters  
NAME RXN-36\_1HNMR\_DMSO  
EXPNO 1  
PROCNO 1

F2 - Acquisition Parameters  
Date\_ 20111004  
Time\_ 17.36  
INSTRUM spect  
PROBHD 5 mm BBO BB-1H  
PULPROG zg30  
TD 65536  
SOLVENT DMSO  
NS 4  
DS 0  
SWH 6172.839 Hz  
FIDRES 0.094190 Hz  
AQ 5.3084660 sec  
RG 256  
DW 81.000 usec  
DE 6.00 usec  
TE 295.6 K  
D1 1.00000000 sec  
D10 1

===== CHANNEL f1 =====  
NUC1 1H  
P1 9.00 usec  
PL1 2.00 dB  
SFO1 300.1318534 MHz

F2 - Processing parameters  
SI 32768  
SF 300.1300000 MHz  
WDW EM  
SSB 0  
LB 0.30 Hz  
GB 0  
PC 1.00

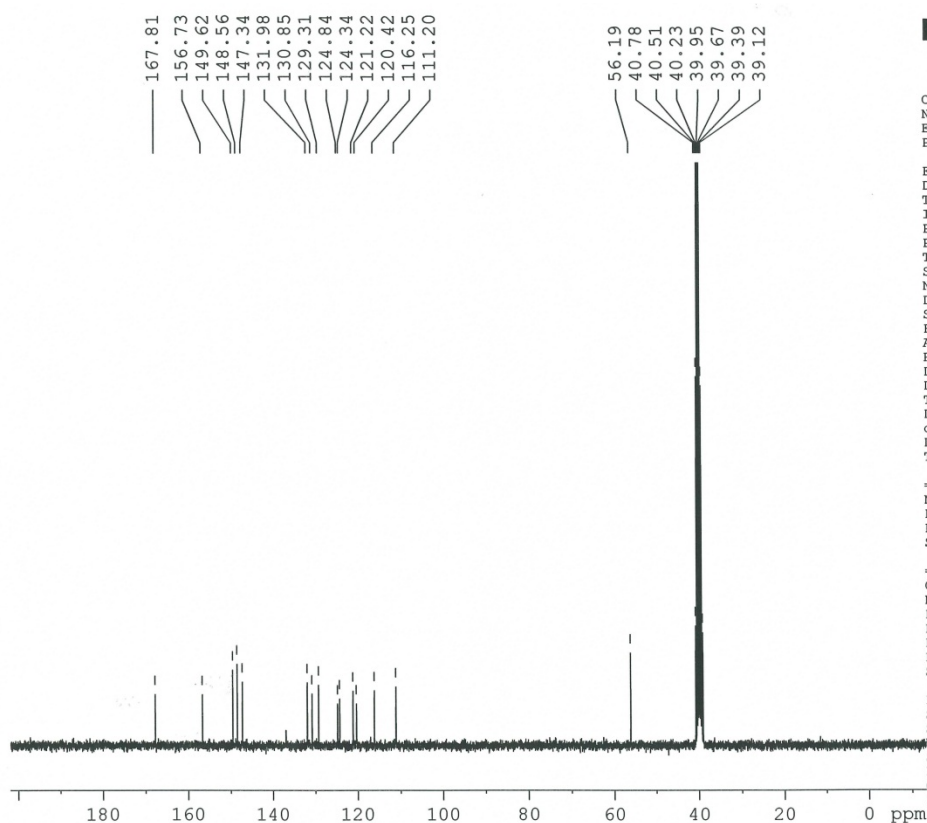

**BRÜKER**

Current Data Parameters  
NAME RXN-36\_13CNMR\_DMSO  
EXPNO 1  
PROCNO 1

F2 - Acquisition Parameters  
Date\_ 20111004  
Time\_ 18.01  
INSTRUM spect  
PROBHD 5 mm BBO BB-1H  
PULPROG zgpg30  
TD 35968  
SOLVENT DMSO  
NS 451  
DS 0  
SWH 17985.611 Hz  
FIDRES 0.500045 Hz  
AQ 0.9999604 sec  
RG 1290.2  
DW 27.800 usec  
DE 6.00 usec  
TE 296.1 K  
D1 2.00000000 sec  
d11 0.03000000 sec  
DELTA 1.89999999 sec  
TD0 1

===== CHANNEL f1 =====  
NUC1 13C  
P1 6.00 usec  
PL1 -5.00 dB  
SFO1 75.4752953 MHz

===== CHANNEL f2 =====  
CPDPRG2 waltz16  
NUC2 1H  
PCPD2 80.00 usec  
PL2 2.00 dB  
PL12 20.98 dB  
PL13 20.00 dB  
SFO2 300.1312005 MHz

F2 - Processing parameters  
SI 32768  
SF 75.4677490 MHz  
WDW EM  
SSB 0  
LB 1.00 Hz  
GB 0  
PC 1.40

## Ramachandran Plot for IAP model

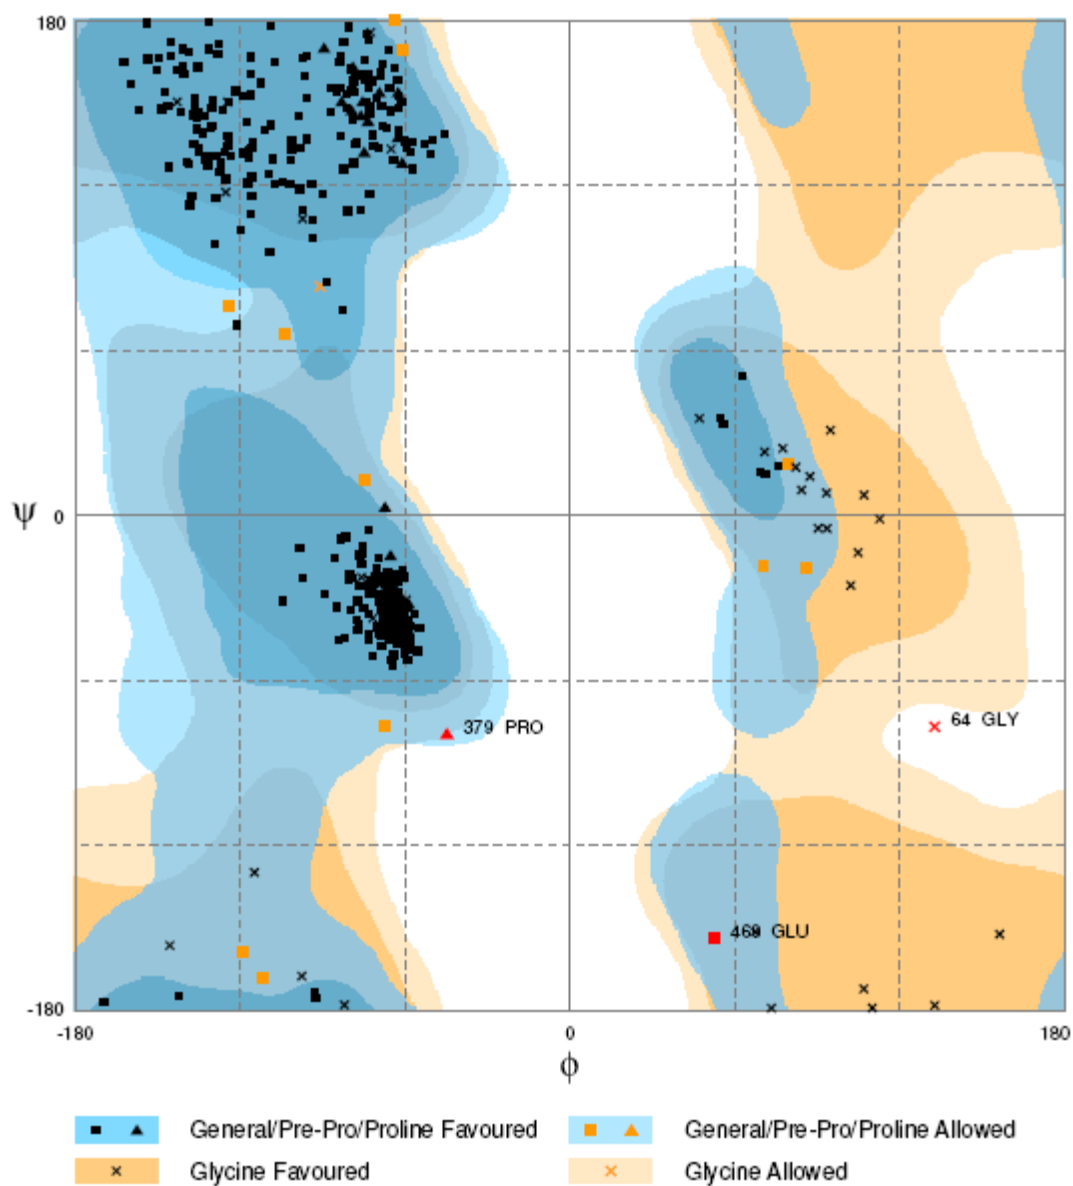

Number of residues in favoured region (~98.0% expected) : 462 (96.9%)  
 Number of residues in allowed region (~2.0% expected) : 12 (2.5%)  
 Number of residues in outlier region : 3 (0.6%)

RAMPAGE by Paul de Bakker and Simon Lovell available at <http://www-cryst.bioc.cam.ac.uk/rampage/>

Please cite: S.C. Lovell, I.W. Davis, W.B. Aschall III, P.I.W. de Bakker, J.M. Word, M.G. Prisant, J.S. Richardson & D.C. Richardson (2002)  
 Structure validation by Ca geometry:  $\psi/\phi$  and C $\beta$  deviation. *Proteins: Structure, Function & Genetics*. 50: 437-450



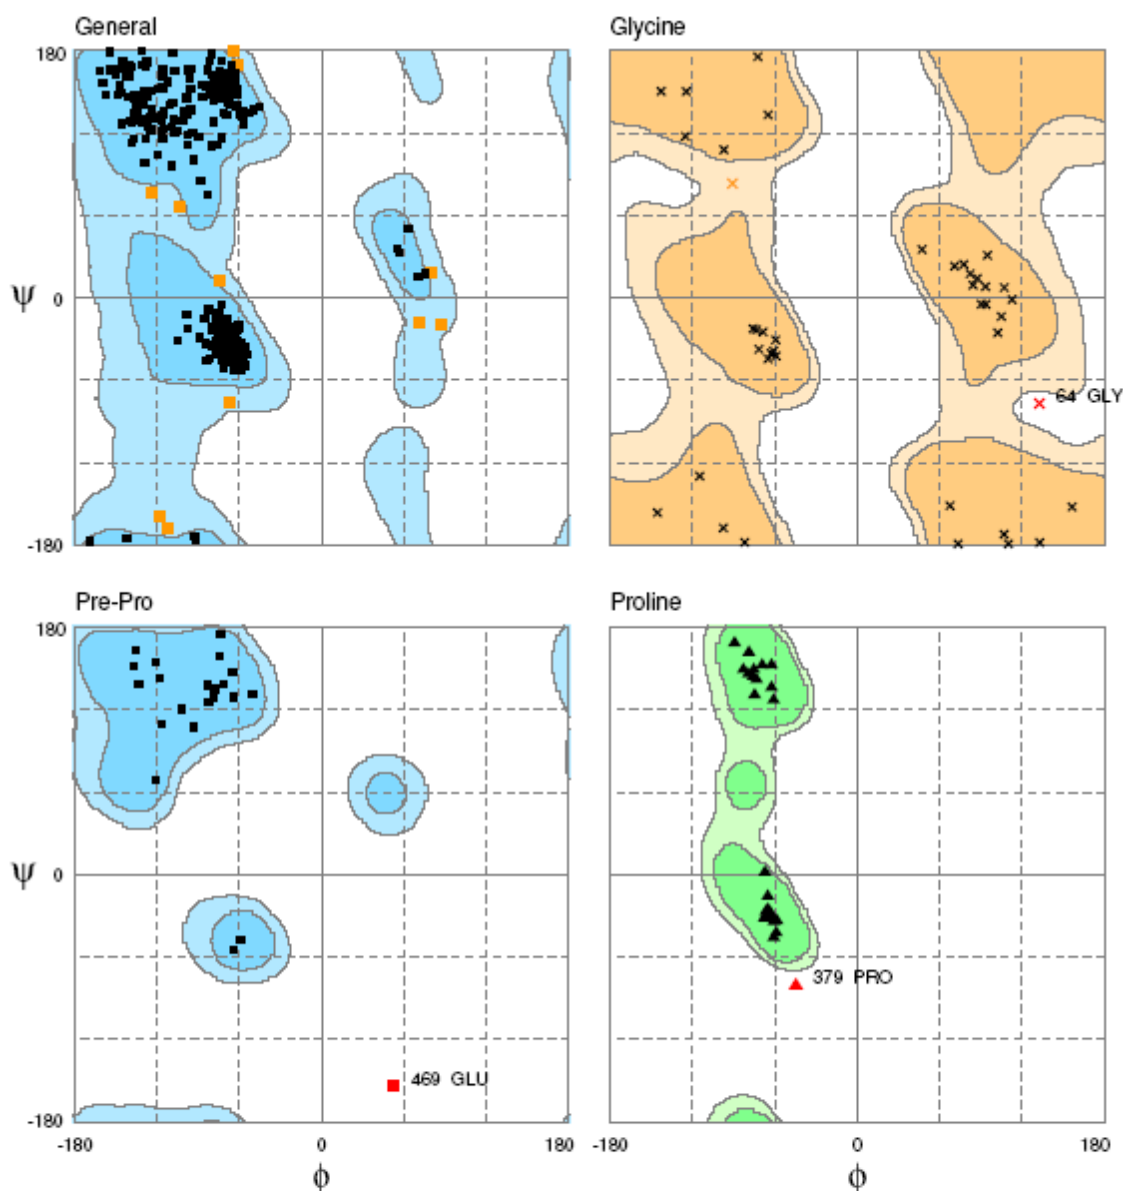

|                                                                                                                                            |                                                                                                                                           |
|--------------------------------------------------------------------------------------------------------------------------------------------|-------------------------------------------------------------------------------------------------------------------------------------------|
| <span style="display:inline-block; width:15px; height:10px; background-color:lightblue; border:1px solid black;"></span> General Favoured  | <span style="display:inline-block; width:15px; height:10px; background-color:lightblue; border:1px solid black;"></span> General Allowed  |
| <span style="display:inline-block; width:15px; height:10px; background-color:orange; border:1px solid black;"></span> Glycine Favoured     | <span style="display:inline-block; width:15px; height:10px; background-color:orange; border:1px solid black;"></span> Glycine Allowed     |
| <span style="display:inline-block; width:15px; height:10px; background-color:lightblue; border:1px solid black;"></span> Pre-Pro Favoured  | <span style="display:inline-block; width:15px; height:10px; background-color:lightblue; border:1px solid black;"></span> Pre-Pro Allowed  |
| <span style="display:inline-block; width:15px; height:10px; background-color:lightgreen; border:1px solid black;"></span> Proline Favoured | <span style="display:inline-block; width:15px; height:10px; background-color:lightgreen; border:1px solid black;"></span> Proline Allowed |

Number of residues in favoured region (~98.0% expected) : 462 (96.9%)  
 Number of residues in allowed region (~2.0% expected) : 12 (2.5%)  
 Number of residues in outlier region : 3 (0.6%)

RAMPAGE by Paul de Bakker and Simon Lovell available at <http://www-cryst.bioc.cam.ac.uk/rampage/>

Please cite: S.C. Lovell, I.W. Davis, W.B. Arendall III, P.I.W. de Bakker, J.M. Word, M.G. Prisant, J.S. Richardson & D.C. Richardson (2002)  
 Structure validation by Ca geometry:  $\psi$  and  $\phi$  deviation. *Protein: Structure, Function & Genetics*, 50: 437-450

## Ramachandran plot for TNAP model

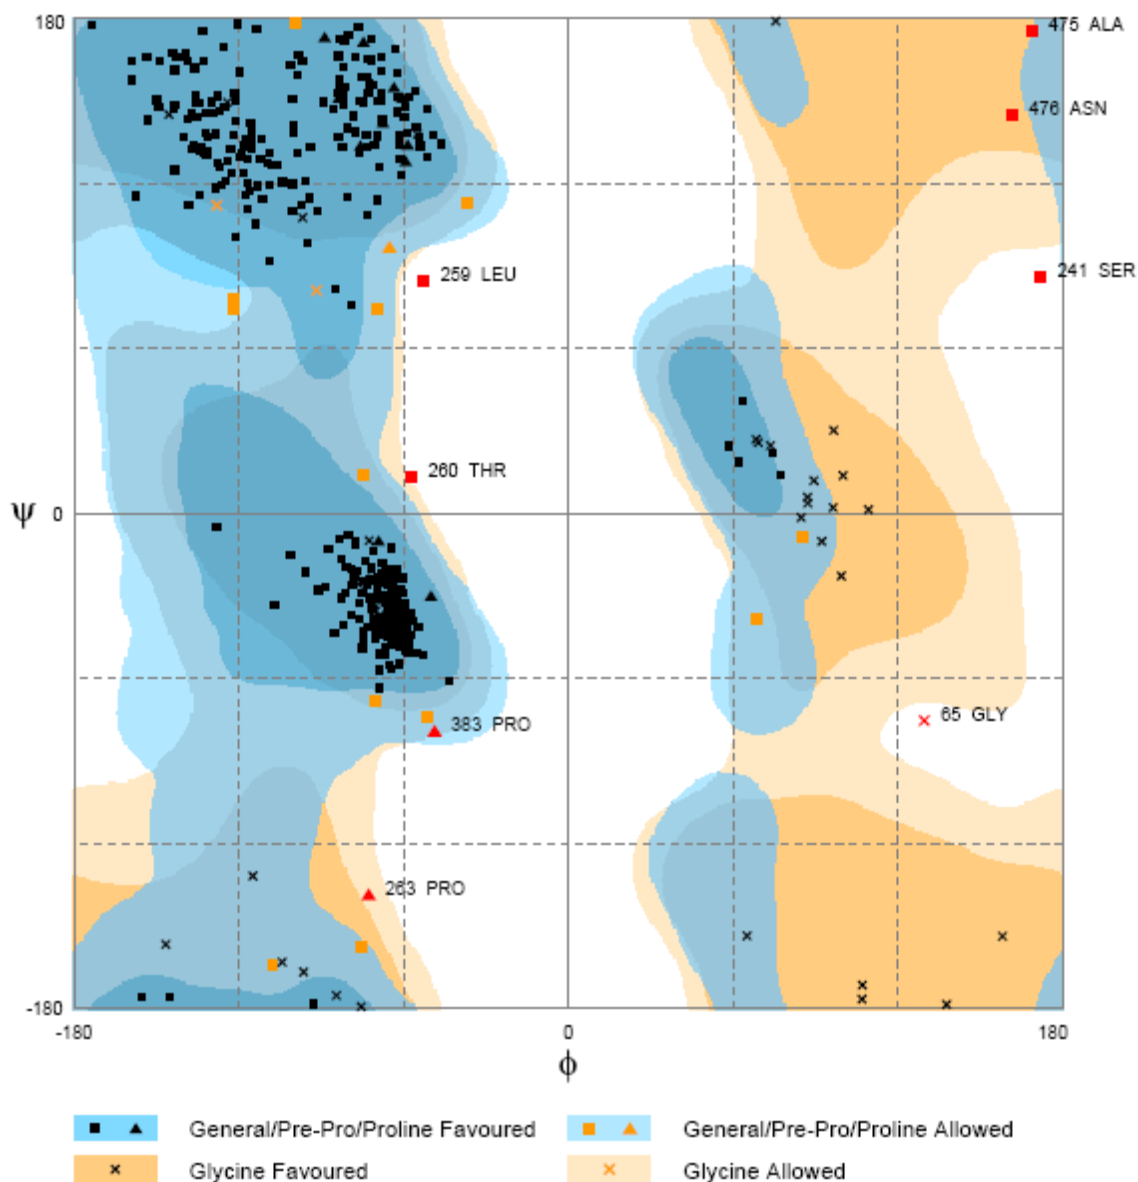

Number of residues in favoured region (~98.0% expected) : 455 (95.2%)  
 Number of residues in allowed region (~2.0% expected) : 15 (3.1%)  
 Number of residues in outlier region : 8 (1.7%)

RAMPAGE by Paul de Bakker and Simon Lovell available at <http://www-cryst.bloc.cam.ac.uk/rampage/>

Please cite: S.C. Lovell, I.W. Davis, W.B. Arendall III, P.I.W. de Bakker, J.M. Word, M.G. Prisant, J.S. Richardson & D.C. Richardson (2002)  
 Structure validation by Ca geometry:  $\phi/\psi$  and C $\beta$  deviation. *Proteins: Structure, Function & Genetics*. 60: 437-450

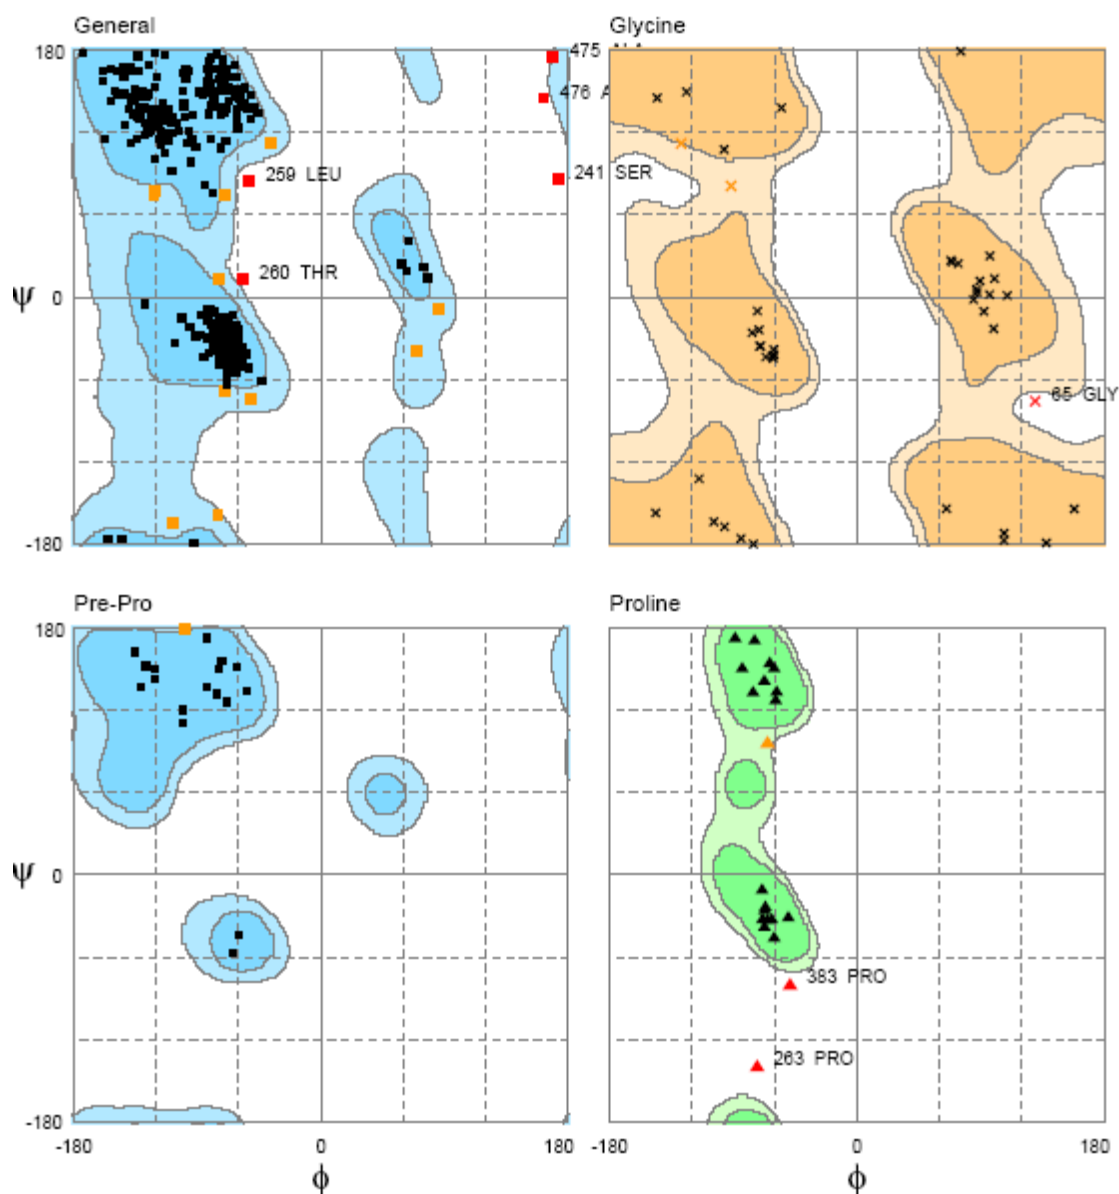

Number of residues in favoured region (~98.0% expected) : 455 (95.2%)  
 Number of residues in allowed region (~2.0% expected) : 15 (3.1%)  
 Number of residues in outlier region : 8 (1.7%)

RAMPAGE by Paul de Bakker and Simon Lovell available at <http://www-cryst.bloc.cam.ac.uk/rampage/>

Please cite: S.C. Lovell, I.W. Davis, W.B. Arendall III, P.I.W. de Bakker, J.M. Word, M.G. Prisant, J.S. Richardson & D.C. Richardson (2002) Structure validation by C $\alpha$  geometry:  $\phi/\psi$  and C $\beta$  deviation. *Proteins: Structure, Function & Genetics*. 60: 437-450
